# Supplementary material
Source: PubMed Central journal article supplement (PMC1440841)
Supplement: 7601056s1.pdf [file 7601056s1.pdf]

## Supplementary Table 1

### SiRNA sequences used in this study.

| Target               | Target sequence                                                                                      | Source    |
|----------------------|------------------------------------------------------------------------------------------------------|-----------|
| UbcH5a               | Ref: Saville, MK <i>et al. J Bio Chem.</i> <b>279</b> 42169-81                                       | Ambion    |
| UbcH5b/c             | Ref: Saville, MK <i>et al. J Bio Chem.</i> <b>279</b> 42169-81                                       | Dharmacon |
| Ubc13 (Human UBE2N)  | #1 CTGCTATCGATCCAGGCCT<br>#2 GCACAGTTCTGCTATCGAT<br>#3 GAGCATGGACTAGGCTATA<br>#4 CAGATGATCCATTAGCAAA |           |
| HBUCE1               | GCGCTAAAGCGGATCCAGA<br>CAGCGTTGACTGTGTCAA<br>GAGAGTGGACACAAAATA<br>GGAATTAACCGACTTGCAG               |           |
| Ubc7 (Human UBE2G2)  | TCTATAAGATTGCCAAGCA<br>GATGGGAGAGTCTGCATTT<br>CCACTTGATTACCCGTTAA<br>GAGATTTACCTGTGAGATG             |           |
| Ubc8 (Human UBE2H)   | CAACATTGATGAAGCGTCA<br>TCTATAGGATTCATGAATA<br>GAGTGGACCTACCTGATAA<br>CGAGAGTAAACATGAGGTT             |           |
| UbcH10 (Human UBE2C) | Ref: Rape, M. and Kirschner, MW.<br><i>Nature</i> <b>432</b> 588-95                                  |           |
| Clathrin heavy chain | Ref: Motley A <i>et al. J Cell Bio.</i> <b>162</b><br>909-18                                         |           |
| AP-2, m2 subunit     | Ref: Motley A <i>et al. J Cell Bio.</i> <b>162</b><br>909-18                                         |           |
| Epsin 1 oligo #1     | GAACTGGCGTCACGTTTAC                                                                                  |           |
| Epsin 1 SMARTpool    | Ref: Huang, F <i>et al, J Biol Chem.</i><br><b>279</b> 16657-61                                      |           |
| Eps15 SMARTpool      | Ref: Huang, F <i>et al, J Biol Chem.</i><br><b>279</b> 16657-61                                      |           |
