# Supplementary material
Source: PubMed Central journal article supplement (PMC1440841)
Supplement: 7601056s2.pdf [file 7601056s2.pdf]

Supplementary Fig 1A

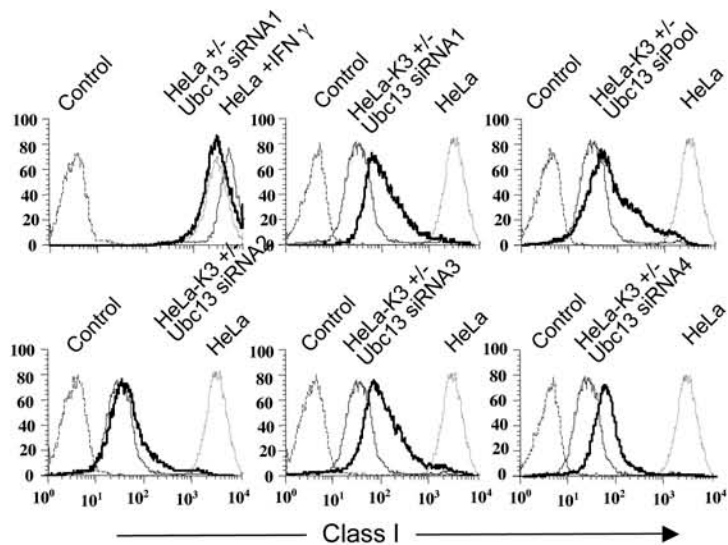

Supplementary Fig 1B

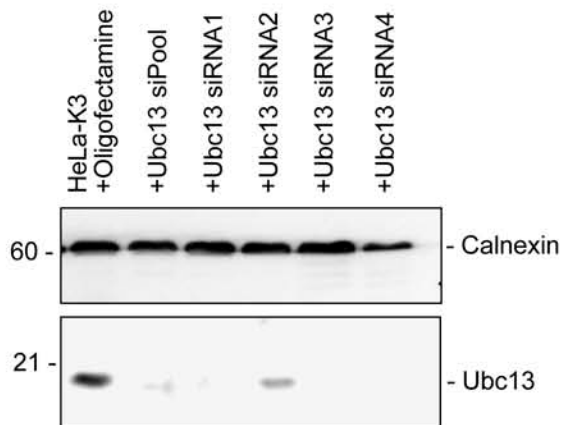

**Supplementary Fig. 1**

**Multiple Ubc13 siRNA oligonucleotides mediate rescue of class I molecules in K3-expressing cells, without inducing an IFN- $\gamma$  effect.**

(a) Cellular depletion of Ubc13 using four unrelated Ubc13 siRNA oligonucleotides (see Supplementary Table 1) promotes class I rescue in HeLa-K3 cells. HeLa and HeLa-K3 cells were analysed for MHC class I expression (as Fig. 1a) following control or four separate Ubc13 siRNA depletions. No IFN- $\gamma$  effect was seen as determined by (i) a lack of increase of class I in HeLa-M cells (an IFN- $\gamma$  sensitive cell line) and (ii) a lack of effect of Ubc13siRNA on tapasin expression, an extremely IFN- $\gamma$  sensitive gene (Ma, W. *et al. J. Biol. Chem.* **272**, 16585-90). (b) immunoblot analysis of Ubc13 depletions, using calnexin as a loading control.
