# Supplementary material
Source: PubMed Central journal article supplement (PMC1440841)
Supplement: 7601056s3.pdf [file 7601056s3.pdf]

Supplementary Fig 2

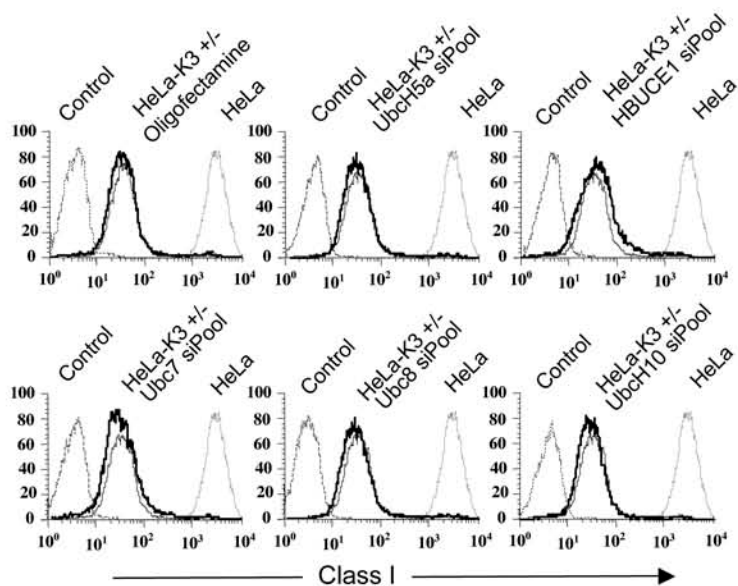

Supplementary Fig 2

**Cellular depletion of additional Ubc enzymes does not affect class I expression in HeLa-K3 cells.** HeLa and HeLa-K3 cells were analysed for class I expression (as Fig. 1A) following control and siRNA mediated depletion of an additional five Ubc's (Ubch5a, UbcHBUCE1, Ubc7, Ubc8 and Ubc10).
